# Supplementary material for: Dynamics of Protein Phosphorylation during Arabidopsis Seed Germination
Source: MDPI journal article supplement (doi:10.3390/ijms23137059), 2022-06-24
Supplement: s1 [file s1]

**Table S1. Dimethyl labels design**

| Triplex<br>number | Light +28            | Intermediate +32 | Heavy +36 | Rep<br>number |
|-------------------|----------------------|------------------|-----------|---------------|
| Tx1               | Internal standard 1  | DI_dry_R1        | LI_dry_R1 | rep1          |
| Tx2               | Internal standard 2  | DI_dry_R2        | LI_dry_R2 | rep2          |
| Tx3               | Internal standard 3  | LI_dry_R3        | DI_dry_R3 | rep3          |
| Tx4               | Internal standard 4  | DI_6_R1          | LI_6_R1   | rep1          |
| Tx5               | Internal standard 5  | DI_6_R2          | LI_6_R2   | rep2          |
| Tx6               | Internal standard 6  | LI_6_R3          | DI_6_R3   | rep3          |
| Tx7               | Internal standard 7  | DI_16_R1         | LI_16_R1  | rep1          |
| Tx8               | Internal standard 8  | DI_16_R2         | LI_16_R2  | rep2          |
| Tx9               | Internal standard 9  | LI_16_R3         | DI_16_R3  | rep3          |
| Tx10              | Internal standard 10 | DI_24_R1         | LI_24_R1  | rep1          |
| Tx11              | Internal standard 11 | DI_24_R2         | LI_24_R2  | rep2          |
| Tx12              | Internal standard 12 | LI_24_R3         | DI_24_R3  | rep3          |
